# Supplementary material for: Iron(ii)-α-keto acid complexes of tridentate ligands on gold nanoparticles: the effect of ligand geometry and immobilization on their dioxygen-dependent reactivity
Source: Royal Society of Chemistry journal article supplement (doi:10.1039/d2dt02433k), 2022-12-07
Supplement: d2dt02433k1.pdf [file d2dt02433k1.pdf]

*Electronic Supplementary Information (ESI)*

*for*

**Iron(II)- $\alpha$ -Keto Acid Complexes of Tridentate Ligands on Gold Nanoparticles: Effect of Ligand Geometry and Immobilization on Their Dioxygen-Dependent Reactivity**

*Abhijit Bera,<sup>a</sup> Debobrata Sheet,<sup>b</sup> and Tapan Kanti Paine<sup>a,\*</sup>*

*<sup>a</sup>School of Chemical Sciences, Indian Association for the Cultivation of Science, 2A & 2B Raja S. C. Mullick Road, Jadavpur, Kolkata-700032, India. Email: [ictkp@iacs.res.in](mailto:ictkp@iacs.res.in)*

*<sup>b</sup>Department of Chemistry, Presidency University, 86/1 College Street, Kolkata-700073, India.*

**Table S1.** Crystallographic data for **1c** and **1d**.

|                                                |                                              |                                          |
|------------------------------------------------|----------------------------------------------|------------------------------------------|
| Empirical formula                              | $C_{3.33}H_{4.22}Cl_{0.44}Fe_{0.22}N_{0.67}$ | $C_{80}H_{88}Cl_8Fe_4N_{12}O_4$          |
| Formula weight                                 | 81.8                                         | 1788.62                                  |
| Temperature/K                                  | 99.96                                        | 109.94                                   |
| Crystal system                                 | monoclinic                                   | Monoclinic                               |
| Space group                                    | P21/c                                        | P21/n                                    |
| a/Å                                            | 8.655(5)                                     | 12.0433(6)                               |
| b/Å                                            | 12.892(7)                                    | 8.8000(4)                                |
| c/Å                                            | 14.631(8)                                    | 21.8652(12)                              |
| $\alpha/^\circ$                                | 90                                           | 90                                       |
| $\beta/^\circ$                                 | 92.845(17)                                   | 105.9850(10)                             |
| $\gamma/^\circ$                                | 90                                           | 90                                       |
| Volume/Å <sup>3</sup>                          | 1630.3(15)                                   | 2227.70(19)                              |
| Z                                              | 18                                           | 1                                        |
| $\rho_{\text{calc}}/\text{cm}^3$               | 1.5                                          | 1.333                                    |
| $\mu/\text{mm}^{-1}$                           | 1.249                                        | 0.930                                    |
| $F(000)$                                       | 760                                          | 924.0                                    |
| Crystal size/mm <sup>3</sup>                   | 0.021 × 0.018 × 0.014                        | 0.2 × 0.15 × 0.15                        |
| 2 $\Theta$ range for data collection/ $^\circ$ | 4.712 to 50.296                              | 4.46 to 49.518                           |
| Index ranges                                   | -10 ≤ h ≤ 10, -15 ≤ k ≤ 15, 17 ≤ l ≤ 17      | -14 ≤ h ≤ 14, -10 ≤ k ≤ 10, -24 ≤ l ≤ 25 |
| Reflections collected                          | 12748                                        | 21576                                    |
| Independent reflections                        | 2768 [Rint = 0.0882, Rsigma = 0.0704]        | 3816 [Rint = 0.0377, Rsigma = 0.0264]    |
| Data/restraints/parameters                     | 2768/21/188                                  | 3816/0/248                               |
| Goodness-of-fit on $F^2$                       | 1.077                                        | 1.050                                    |
| Final R indexes [ $I \geq 2\sigma(I)$ ]        | R1 = 0.1055, wR2 = 0.2635                    | R1 = 0.0323, wR2 = 0.0734                |
| Final R indexes [all data]                     | R1 = 0.1252, wR2 = 0.2780                    | R1 = 0.0417, wR2 = 0.0807                |
| Largest diff. peak/hole / e Å <sup>-3</sup>    | 1.40/-0.66                                   | 0.30/-0.80                               |

**Table S2.** Selected bond lengths (Å) and bond angles (°) for **1c**.

|             |            |            |          |
|-------------|------------|------------|----------|
| Fe1-Cl1     | 2.297(3)   | Fe1-Cl2    | 2.334(3) |
| Fe1-N3      | 2.252(9)   | Fe1-N1     | 2.140(9) |
| Fe1-N2      | 2.290(10)  |            |          |
| Cl1-Fe1-Cl2 | 127.59(12) | N3-Fe1-Cl1 | 97.0(2)  |
| N3-Fe1-Cl2  | 91.9(2)    | N3-Fe1-N2  | 153.1(3) |
| N1-Fe1-Cl1  | 117.7(2)   | N1-Fe1-Cl2 | 114.7(2) |
| N1-Fe1-N3   | 76.9(3)    | N1-Fe1-N2  | 76.4(3)  |
| N2-Fe1-Cl1  | 98.5(3)    | N2-Fe1-Cl2 | 95.9(3)  |

**Table S3.** Selected bond lengths (Å) and bond angles (°) for **1d**.

|               |           |                |            |
|---------------|-----------|----------------|------------|
| Fe01-Cl1      | 2.4648(7) | Fe01-Cl1'      | 2.4923(7)  |
| Fe01-Cl2      | 2.3192(7) | Fe01-O2        | 2.2048(16) |
| Fe01-N1       | 2.298(2)  | Fe01-N2        | 2.289(2)   |
| Cl1-Fe01-Cl1' | 82.60(2)  | Cl2-Fe01-Cl1'  | 99.24(2)   |
| Cl2-Fe01-Cl1  | 103.17(2) | O2-Fe01-Cl1'   | 95.53(5)   |
| O2-Fe01-Cl1   | 87.53(5)  | O2-Fe01-Cl2    | 162.72(5)  |
| O2-Fe01-N1    | 71.43(6)  | O2-Fe01-N2     | 68.87(7)   |
| N1-Fe01-Cl1   | 157.39(5) | N1-Fe01-Cl1'   | 91.09(5)   |
| N1-Fe01-Cl2   | 99.26(5)  | N2-Fe01-Cl1'   | 164.04(5)  |
| N2-Fe01-Cl1   | 93.04(5)  | N2-Fe01-Cl2    | 96.69(5)   |
| N2-Fe01-N1    | 87.11(7)  | Fe01-Cl1-Fe01' | 97.40(2)   |

**Table S4.** Reaction rate, obtained from the amount of benzoic acid (BA) formed with time, for the oxidative decarboxylation of iron(II)-BF complexes with dioxygen.

| Complex   | Rate                     |
|-----------|--------------------------|
| <b>1a</b> | 0.0084 mMh <sup>-1</sup> |
| <b>1b</b> | 0.028 mMh <sup>-1</sup>  |
| <b>2a</b> | 0.037 mMh <sup>-1</sup>  |
| <b>2b</b> | 0.12 mMh <sup>-1</sup>   |

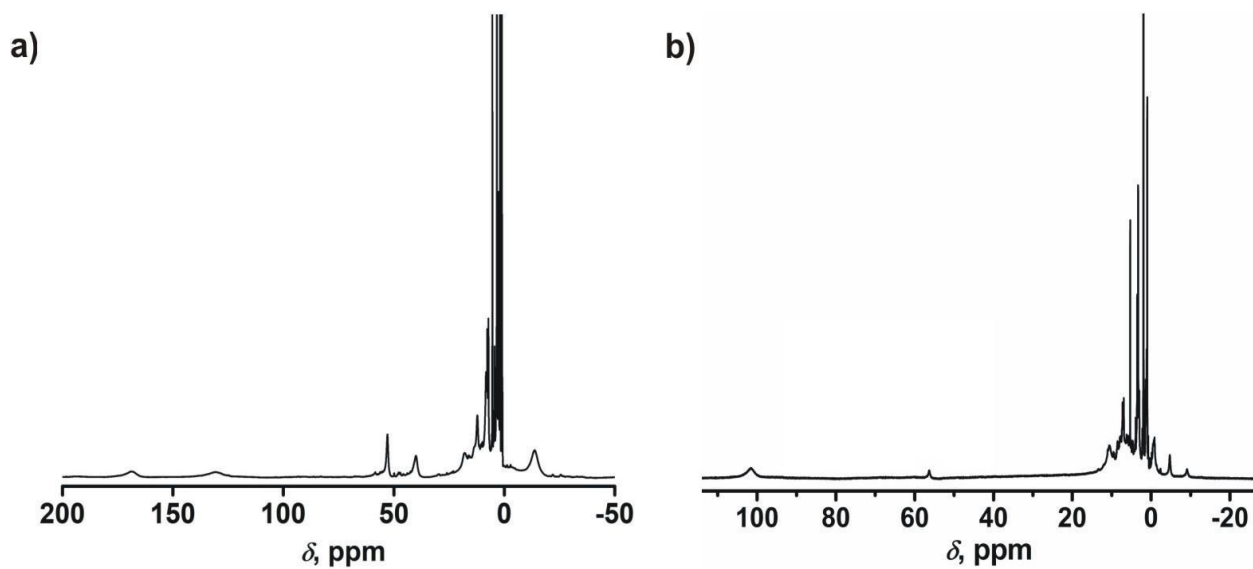

**Figure S1.**  $^1\text{H}$  NMR (500 MHz,  $\text{CD}_3\text{CN}$ , 295 K) spectra of (a)  $[(6\text{Me}_2\text{-Me-BPA})\text{Fe}(\text{BF})](\text{ClO}_4)$  (**1a**) and (b)  $[(6\text{Me}_3\text{-TPMM})\text{Fe}(\text{BF})](\text{ClO}_4)$  (**1b**).

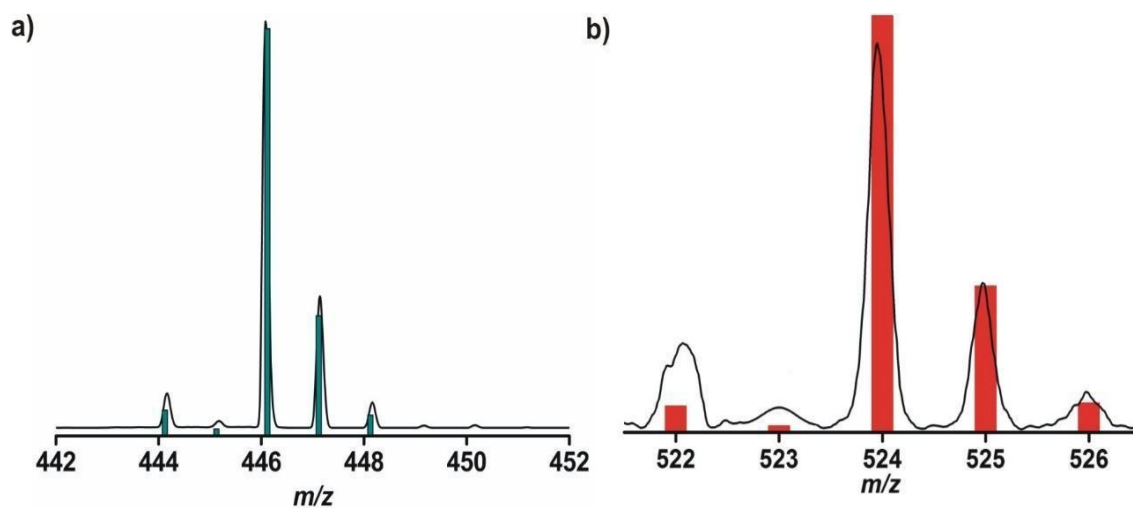

**Figure S2.** ESI (positive ion mode in acetonitrile) mass spectra of (a) complex **1a** and (b) complex **1b**.

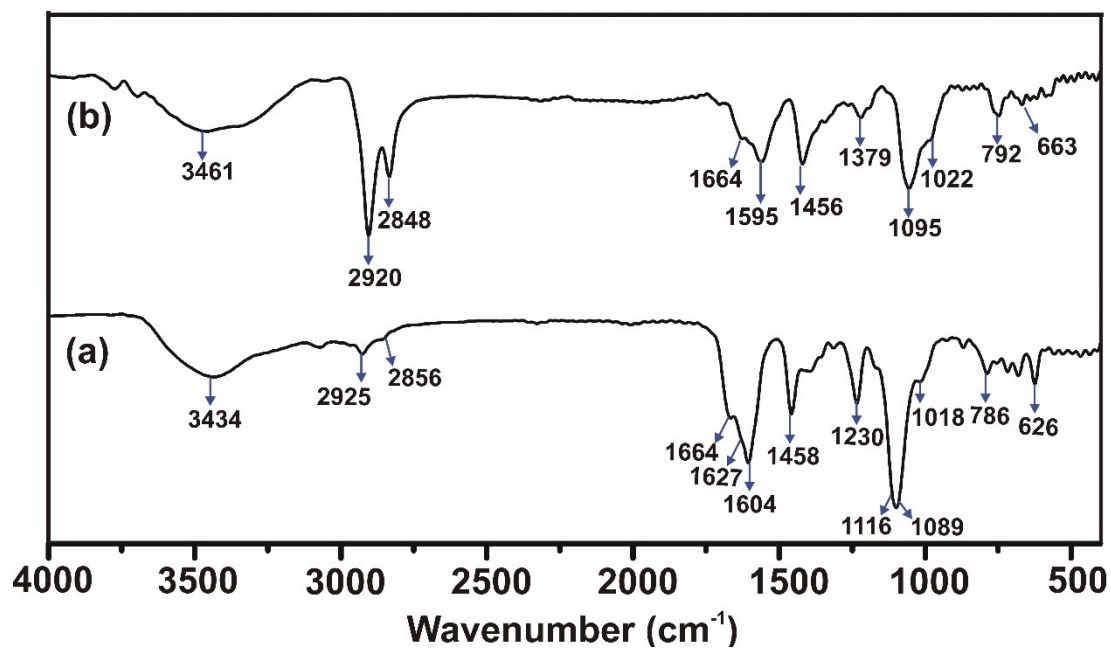

**Figure S3.** Solid-state FTIR spectra of (a) complex **1a** and (b) complex **2a**.

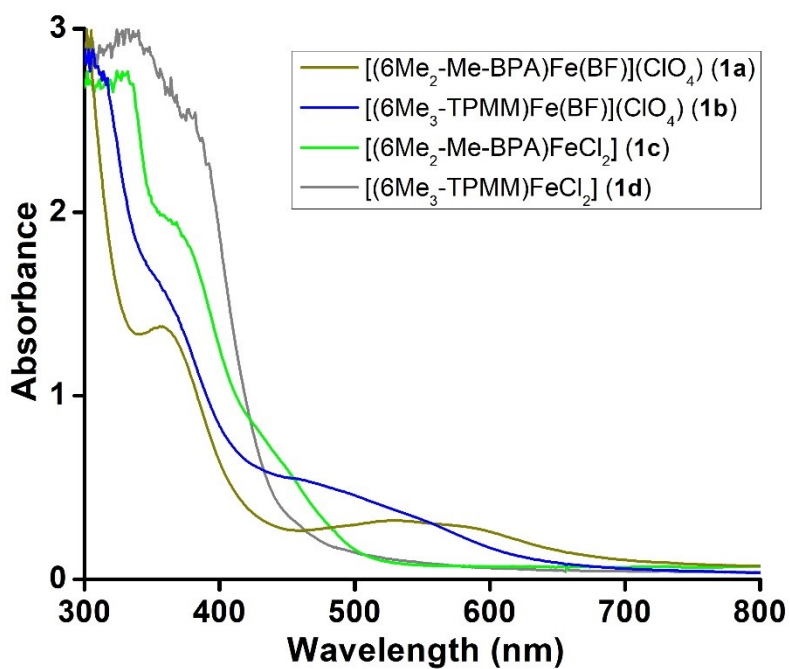

**Figure S4.** UV-vis spectra of **1a**, **1b**, **1c** and **1d** in dichloromethane at 295 K.

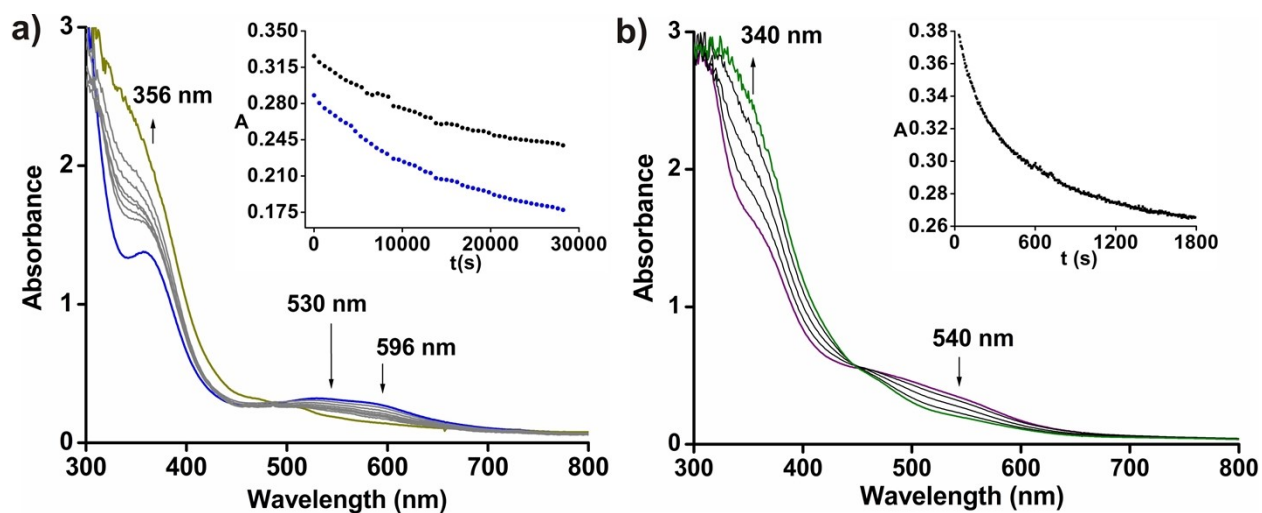

**Figure S5.** Optical spectral changes during the reaction of (a) **1a** and (b) **1b** (1 mM) with dioxygen in dichloromethane at 295K. Insets: change of peak intensities as a function of time.

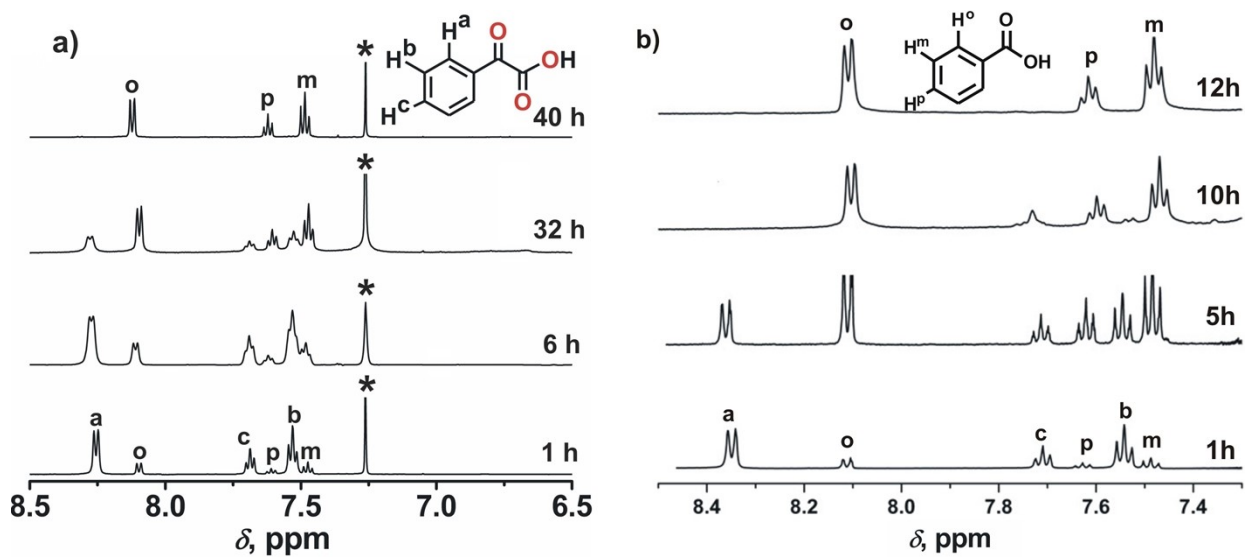

**Figure S6.** Time-dependent <sup>1</sup>H NMR spectra (500 MHz, CDCl<sub>3</sub>, 295 K) of the organic products formed during the reaction of (a) **1a** and (b) **1b** with dioxygen.

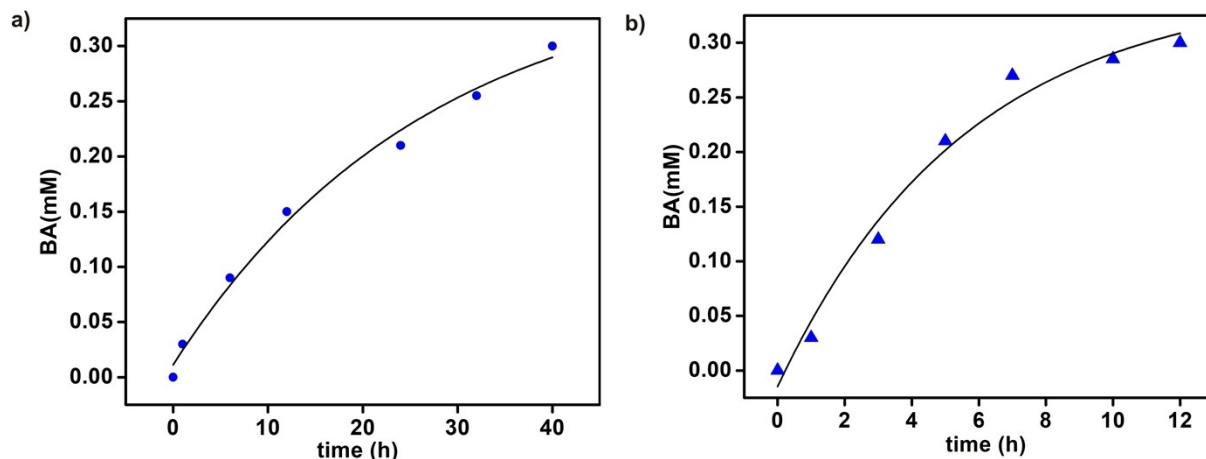

**Figure S7.** Formation of benzoic acid (BA) as a function of time for the oxidative decarboxylation of (a) **1a** and (b) **1b**. Experimental condition: 0.003 mmol complex, 10 mL  $\text{CH}_3\text{CN}$  at 298 K.

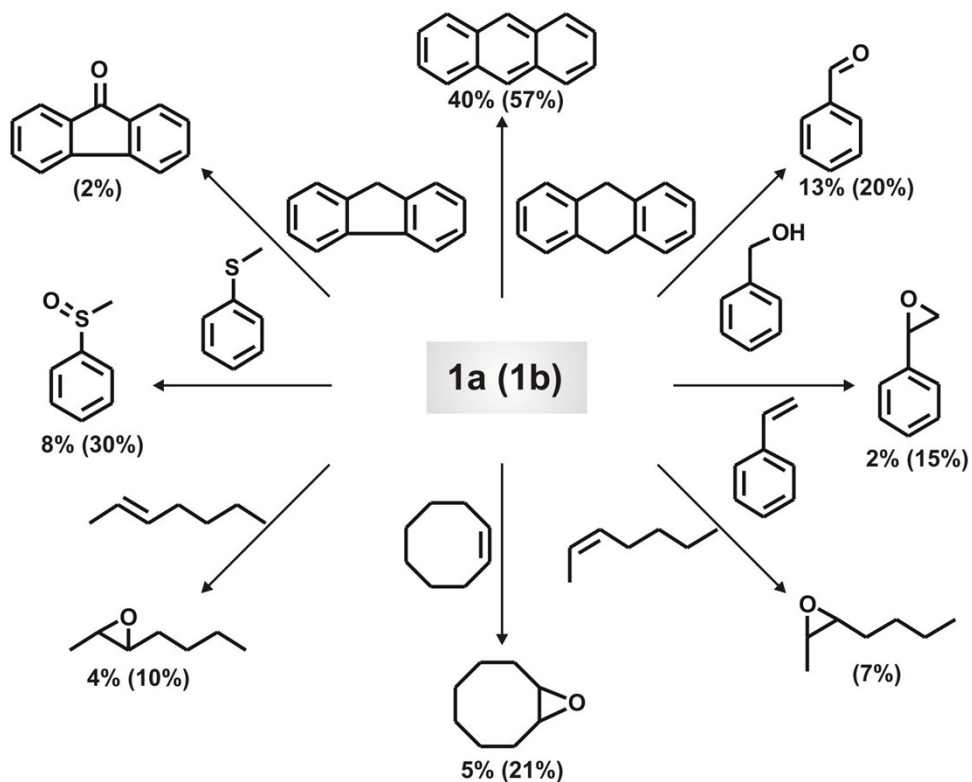

**Scheme S1.** Interception of the iron-oxygen oxidant, formed from **1a (1b)** in the reaction with dioxygen, by external substrates.

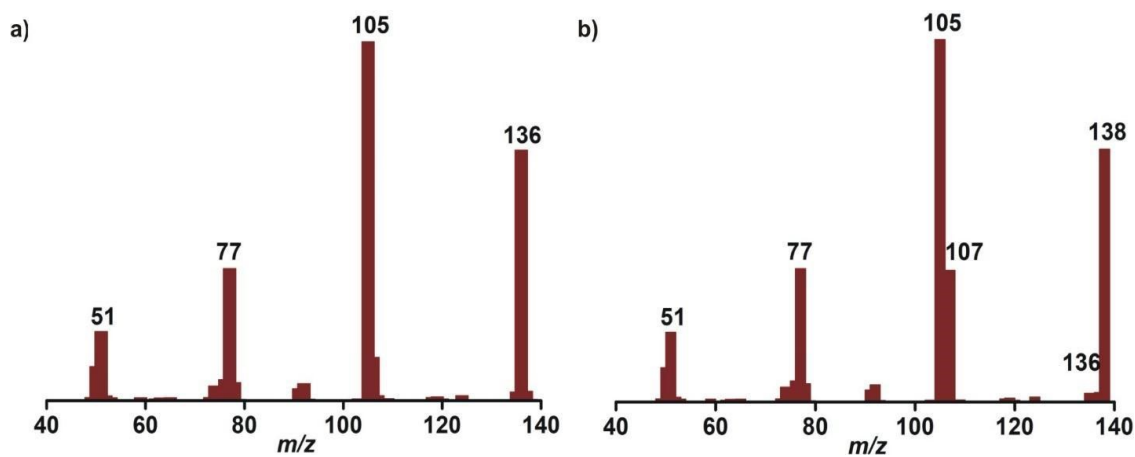

**Figure S8.** GC-mass spectra of benzoic acid (as methyl ester) isolated from the reaction of **1a** with (a)  $^{16}\text{O}_2$  and (b)  $^{18}\text{O}_2$ .

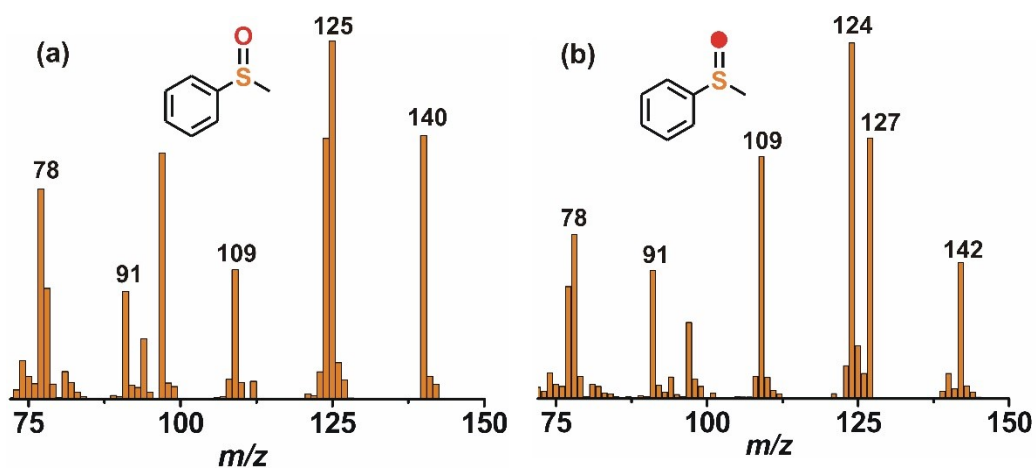

**Figure S9.** GC-mass spectra of thioanisole oxide formed in the reaction of **1a** with thioanisole in the presence of (a)  $^{16}\text{O}_2$  and (b)  $^{18}\text{O}_2$ .



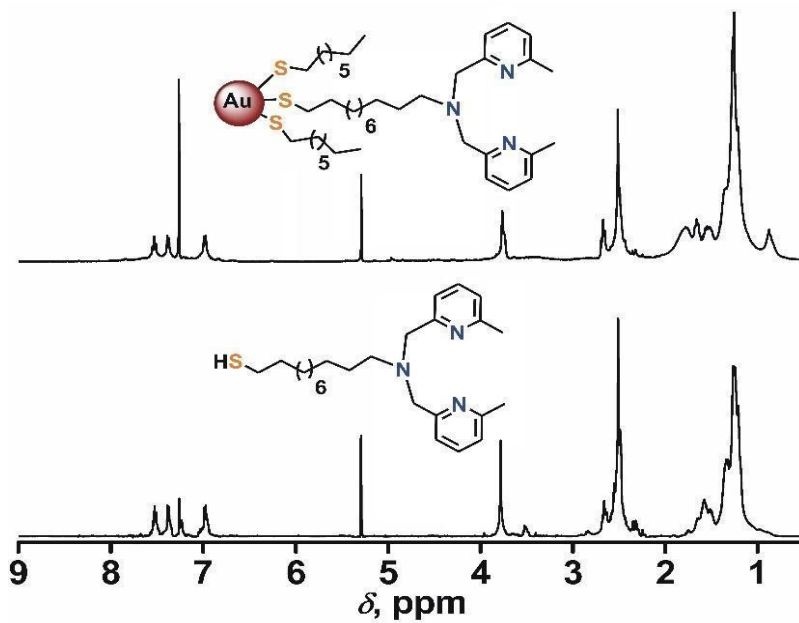

**Figure S10.**  $^1\text{H}$  NMR spectra (500 MHz,  $\text{CDCl}_3$ , 295 K) of (a)  $6\text{Me}_2\text{-BPASH}$  and (b)  $(6\text{Me}_2\text{-BPASH})@\text{C}_8\text{Au}$ .

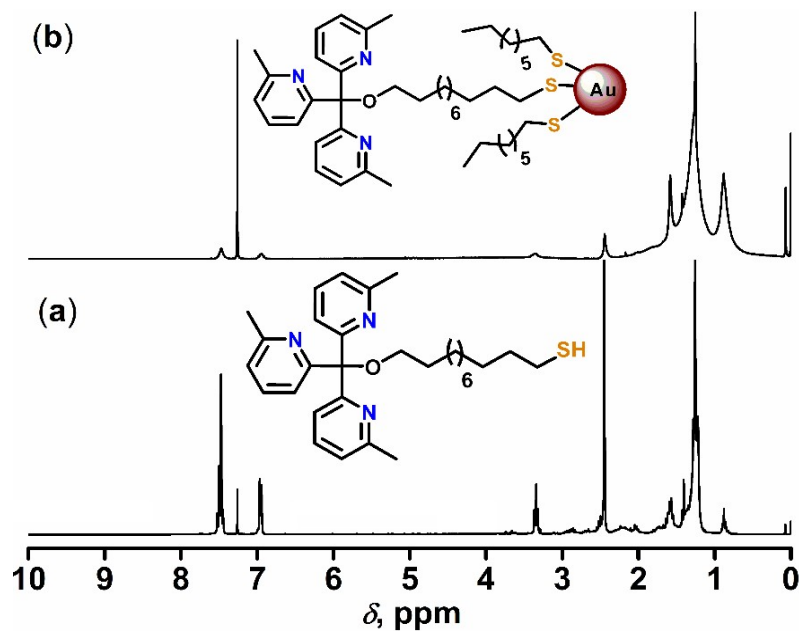

**Figure S11.**  $^1\text{H}$  NMR spectra (500 MHz,  $\text{CDCl}_3$ , 295 K) of (a)  $6\text{Me}_3\text{-TPMSH}$  and (b)  $(6\text{Me}_3\text{-TPMSH})@\text{C}_8\text{Au}$ .

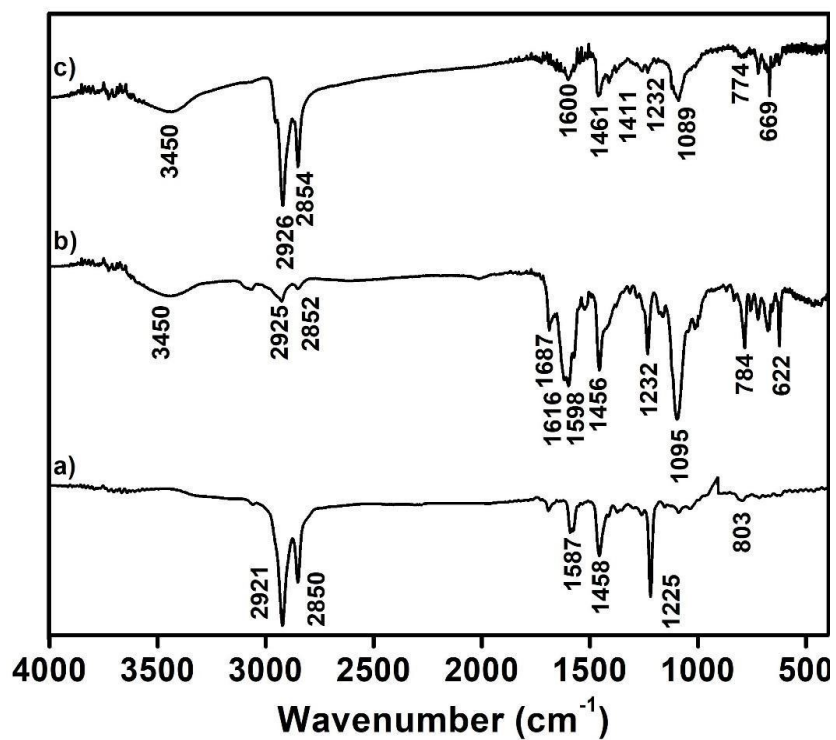

**Figure S12.** FTIR spectra of (a)  $C_8Au$ , (b) complex **1b** and (c) complex **2b**.

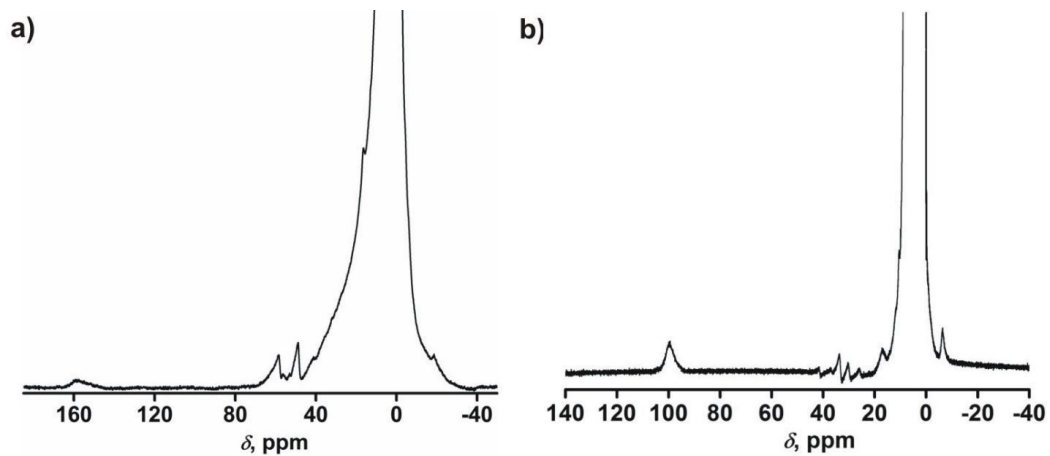

**Figure S13.**  $^1H$  NMR (500 MHz,  $CD_3CN$ , 295 K) spectra of (a) complex **2a** and (b) complex **2b**.

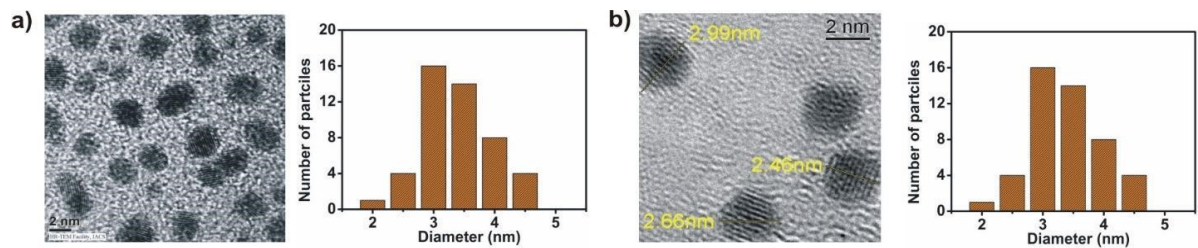

Figure S14. TEM image (left) and histogram (right) for (a) complex 2a and (b) complex 2b.

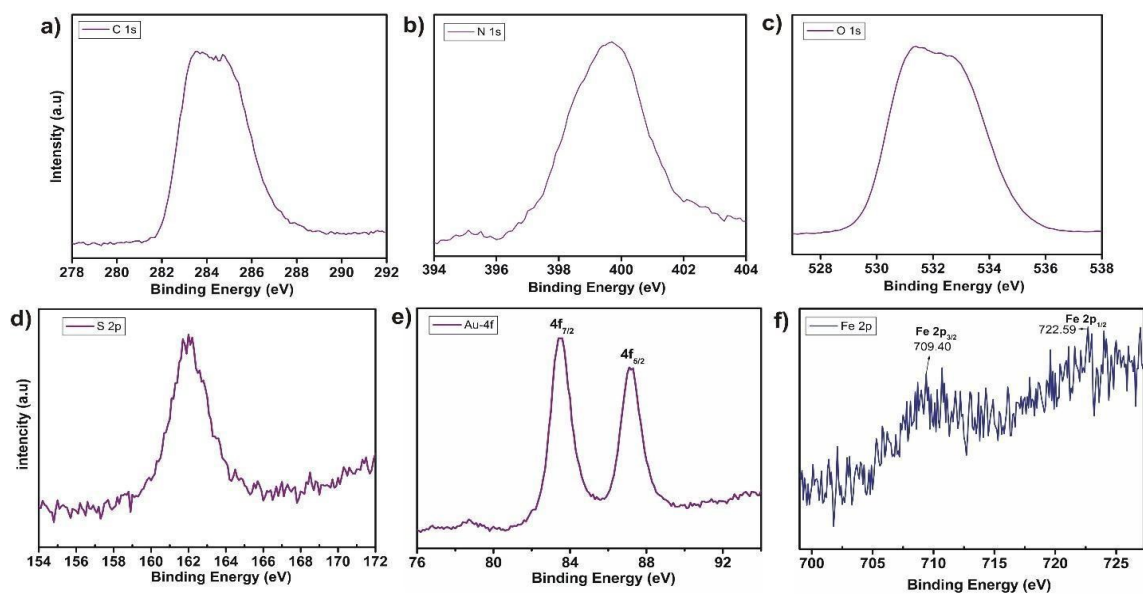

Figure S15. XPS spectra of complex 2a.

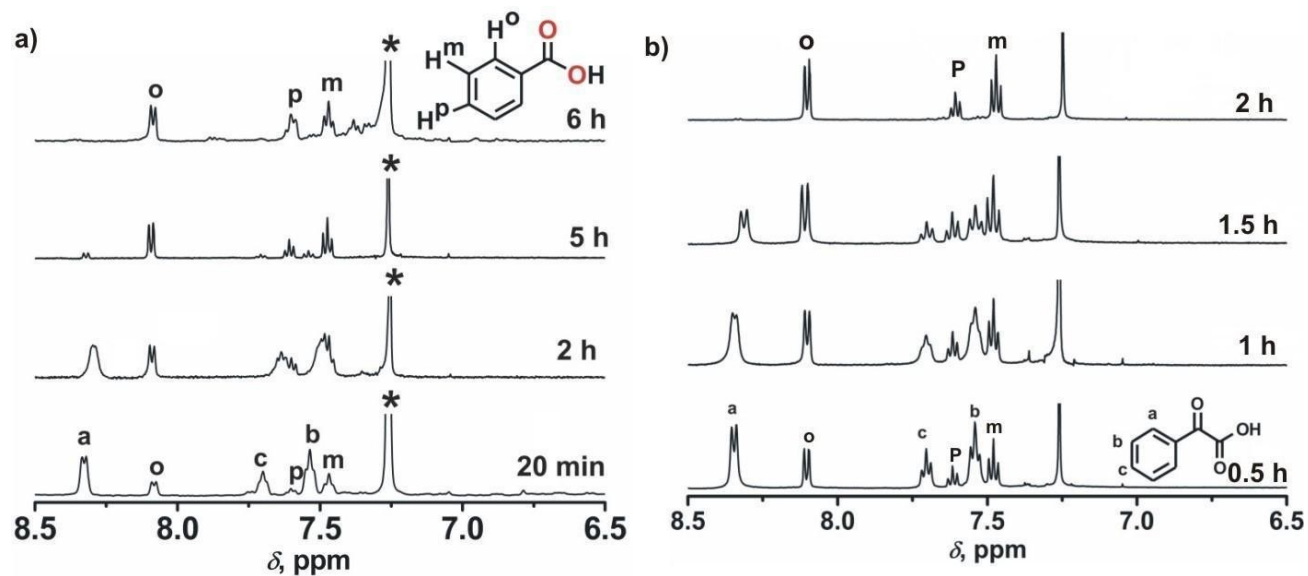

**Figure S16.** Time-dependent  $^1\text{H}$  NMR spectra (500 MHz,  $\text{CDCl}_3$ , 295 K) of the organic products formed during the reaction of (a) complex **2a** and (b) complex **2b** with dioxygen.

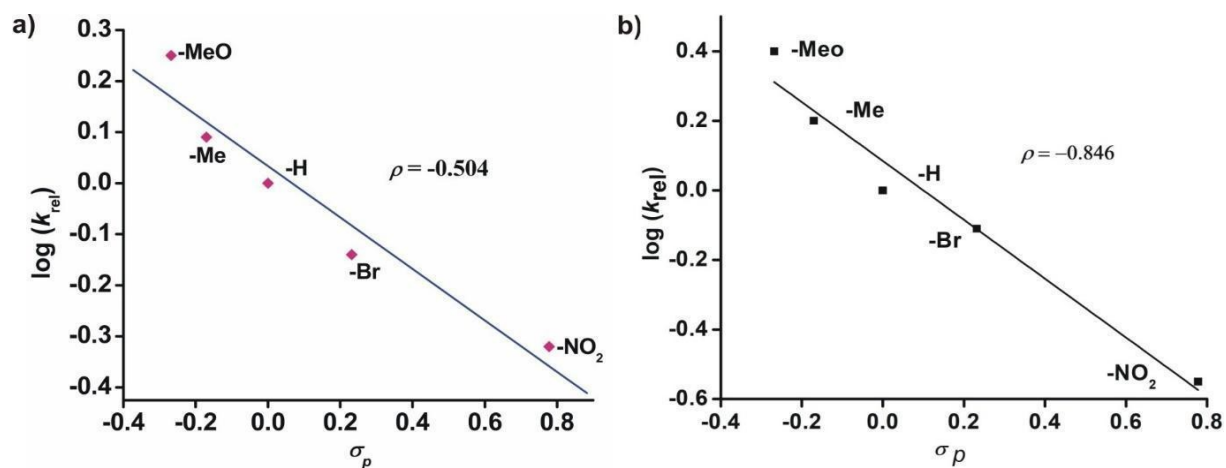

**Figure S17.** Hammett plot of  $\log k_{\text{rel}}$  against  $\sigma_p$  for para-substituted thioanisoles oxidation with complex **2a** and **2b**. The  $k_{\text{rel}}$  values are calculated by dividing the concentration of product from substituted thioanisoles by the concentration of product from thioanisole.

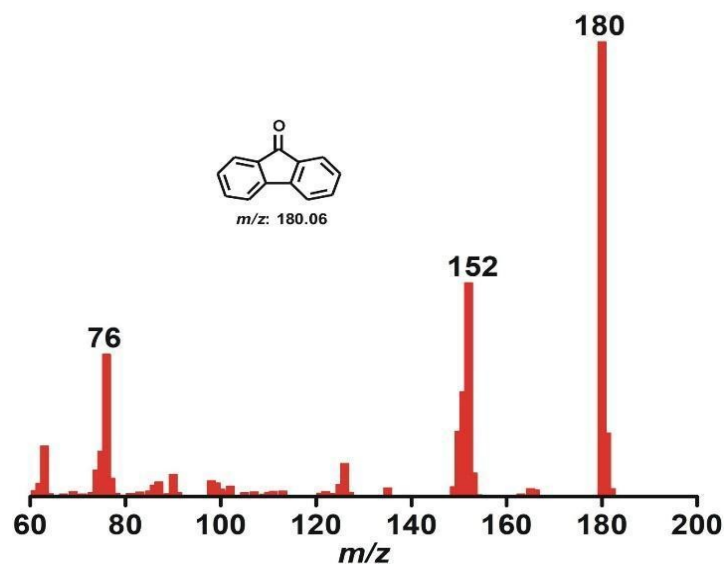

**Figure S18.** GC-mass spectra of fluorenone formed from fluorene in the oxidation with complex **2b**.

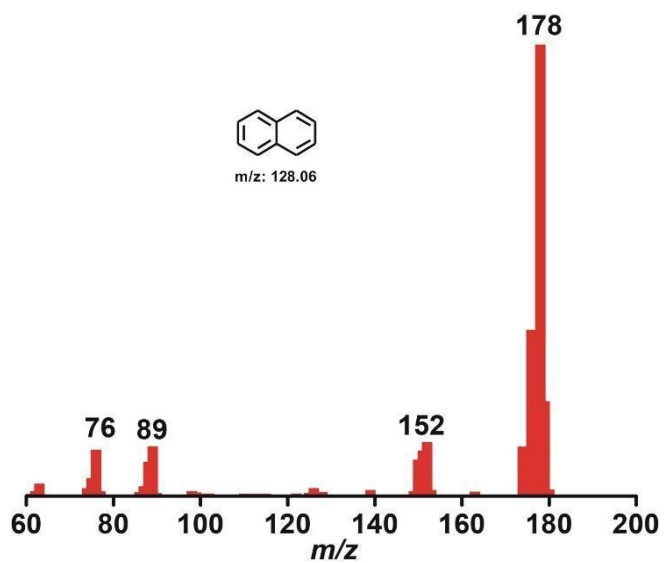

**Figure S19.** GC-mass spectrum of anthracene formed from 9,10-dihydroanthracene in the oxidation with complex **2b**.

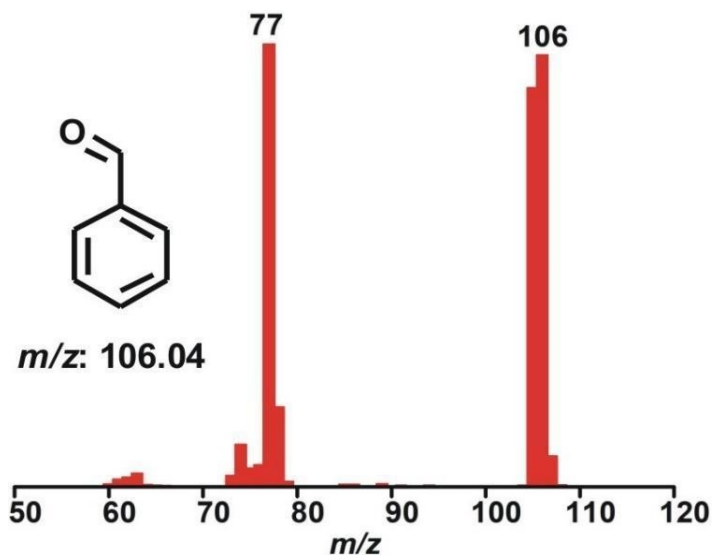

**Figure S20.** GC-mass spectrum of benzaldehyde formed from benzyl alcohol in the oxidation with complex **2b**.

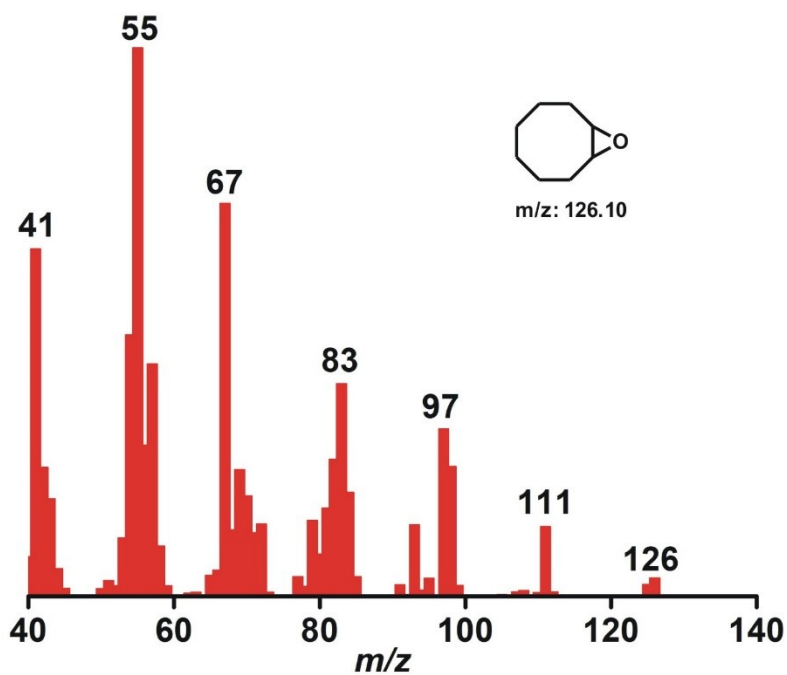

**Figure S21.** GC-mass spectrum of cyclooctene epoxide formed from cyclooctene in the oxidation with complex **2b**.

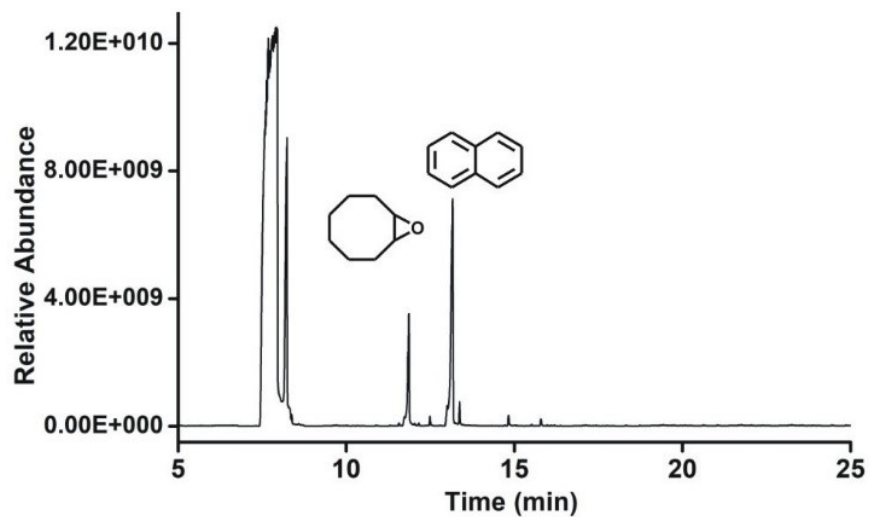

**Figure S22.** Chromatogram of cyclooctene epoxide formed from cyclooctene in the oxidation with complex **2b**.

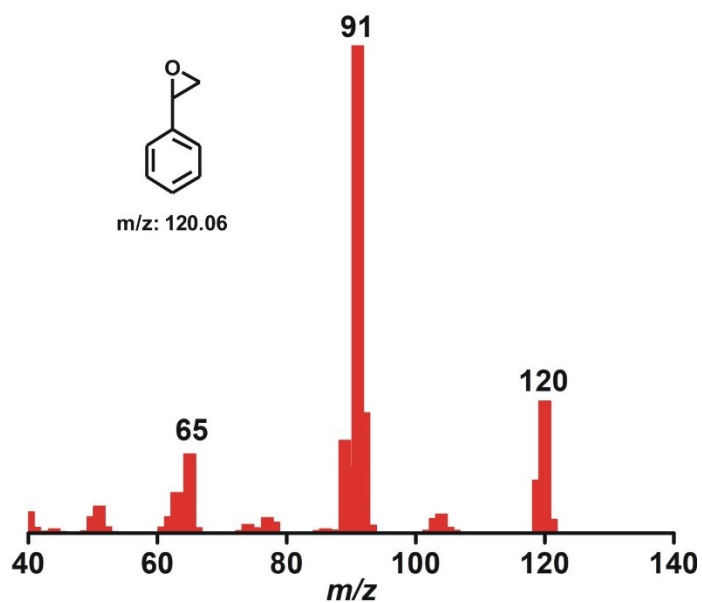

**Figure S23.** GC-mass spectrum of styrene epoxide formed from styrene in the oxidation with complex **2b**.

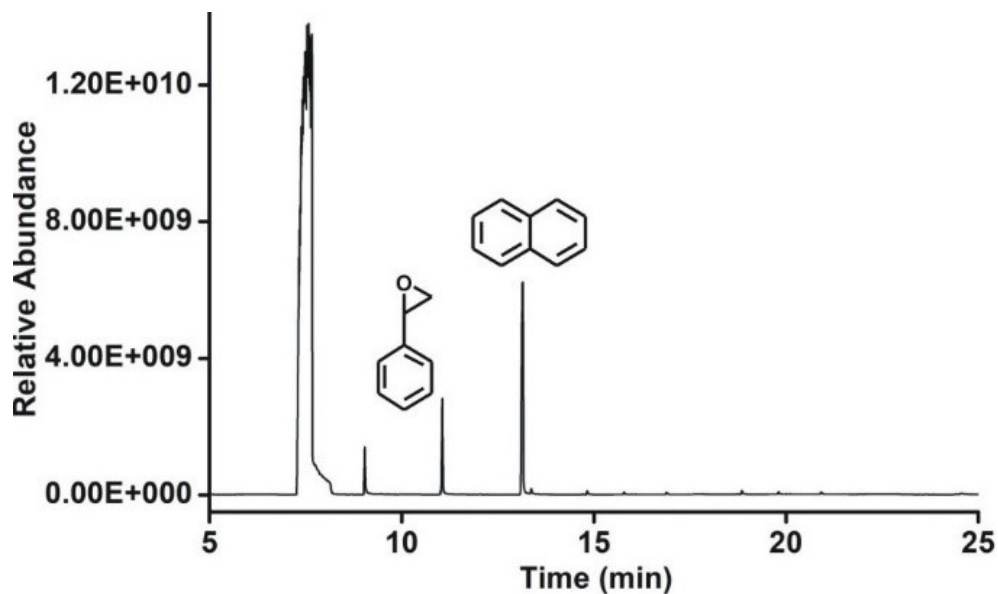

**Figure S24.** Chromatogram of styrene epoxide formed from styrene in the oxidation with complex **2b**.

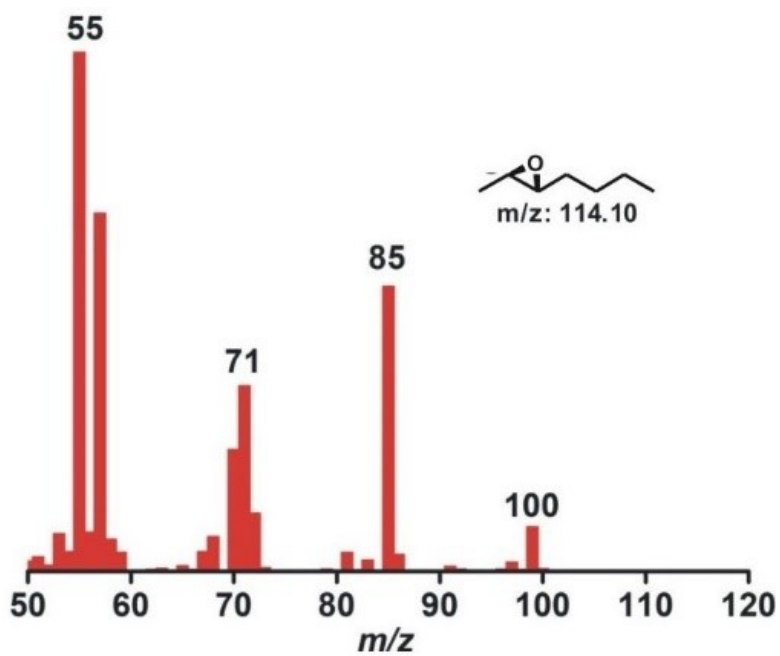

**Figure S25.** GC-mass spectrum of trans-heptene epoxide formed from trans-2-heptene in the oxidation with complex **2b**.



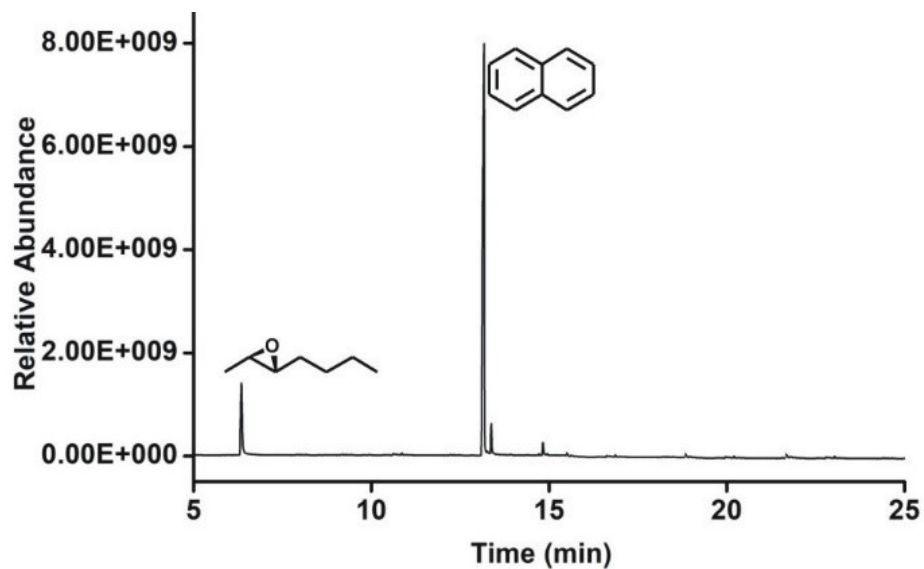

**Figure S26.** Chromatogram of trans-heptene epoxide formed from trans-heptene in the oxidation with complex **2b**.

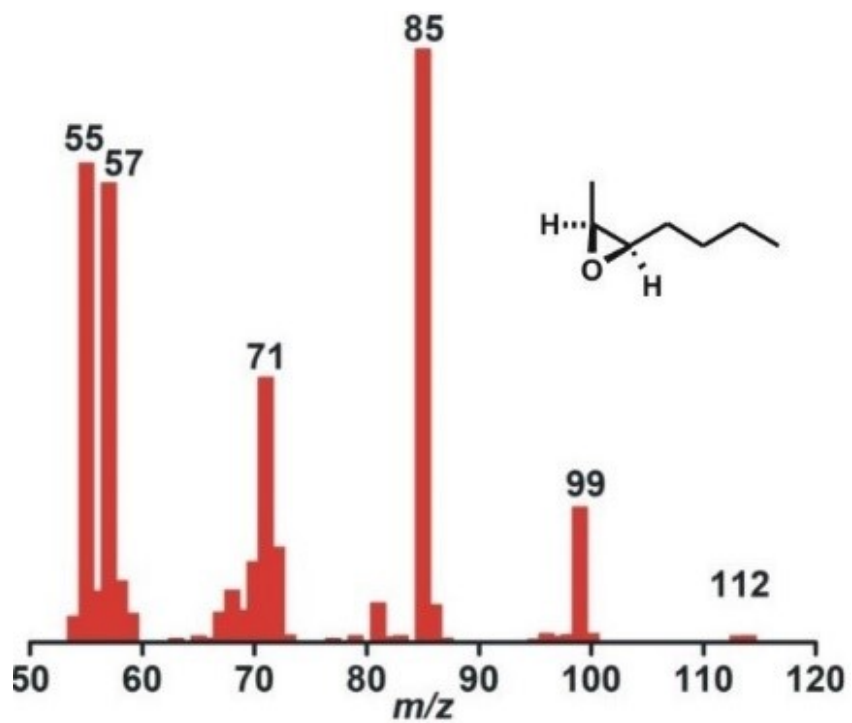

**Figure S27.** GC-mass spectrum of cis-heptene epoxide formed from cis-2-heptene in the oxidation with complex **2b**.

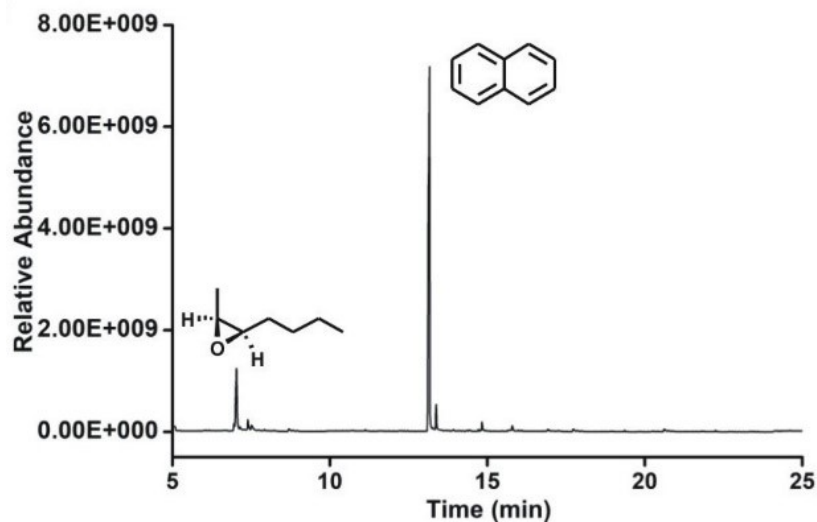

**Figure S28.** Chromatogram of cis-heptene epoxide formed from cis-heptene in the oxidation with complex **2b**.

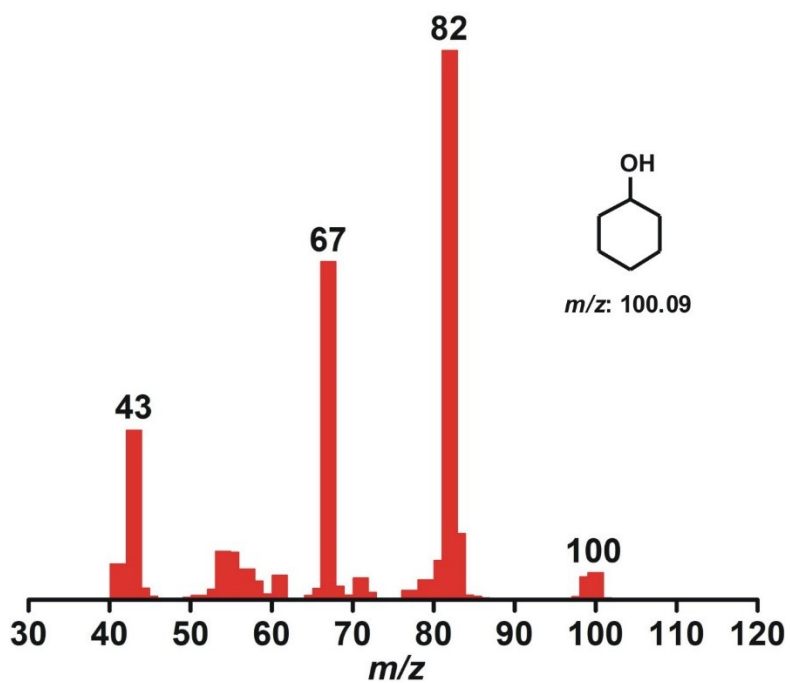

**Figure S29.** GC-mass spectrum of cyclohexanol formed from cyclohexane in the oxidation with complex **2b**.

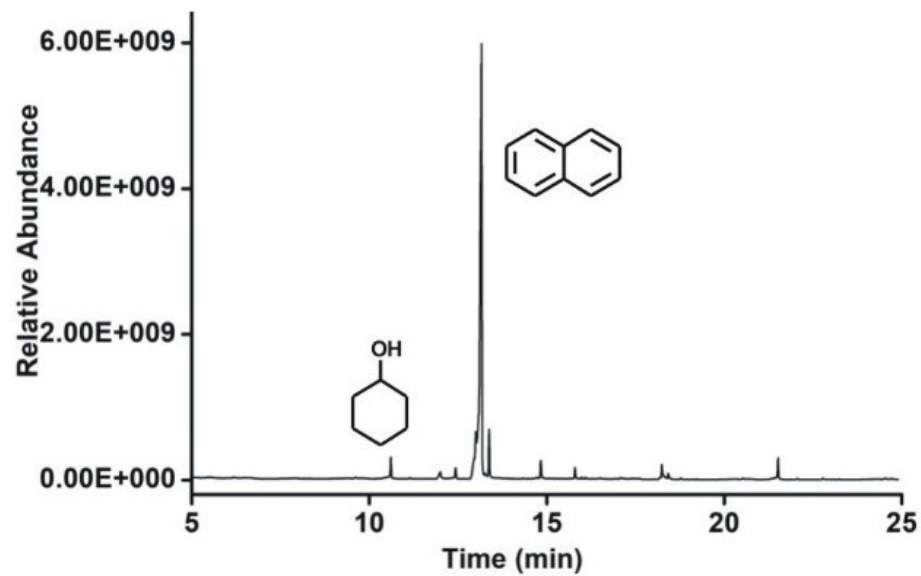

**Figure S30.** Chromatogram of cyclohexanol formed from cyclohexane in the oxidation with complex **2b**.

.....
